# Supplementary material for: High variability of genomic instability and gene expression profiling in different HeLa clones
Source: PubMed Central journal article supplement (PMC4613361; doi:10.1038/srep15377), 2015-10-20
Supplement: srep15377-s1.pdf [file srep15377-s1.pdf]

## ***Supplementary Information***

### **High variability of genomic instability and gene expression profiling in different HeLa clones**

Annalisa Frattini<sup>1,2\*</sup>, Marco Fabbri<sup>2</sup>, Roberto Valli<sup>2</sup>, Elena De Paoli<sup>2</sup>, Giuseppe Montalbano<sup>2</sup>, Laura Gribaldo<sup>3</sup>, Francesco Pasquali<sup>2</sup> and Emanuela Maserati<sup>2</sup>

<sup>1</sup>*Institute of Genetic and Biomedical Research (IRGB), National Research Council (CNR), via Fantoli 15/16, 20090 Milan, Italy.* <sup>2</sup>*Department of Clinical and Experimental Medicine (DMCS), University of Insubria, via J.H. Dunant, 15, 21100 Varese, Italy.* <sup>3</sup>*Institute for Health and Consumer Protection, European Commission, via Enrico Fermi 2749, 21027 Ispra (VA), Italy.*

*\*Correspondence and requests for materials should be addressed to A.F.  
([annalisa.frattini@irgb.cnr.it](mailto:annalisa.frattini@irgb.cnr.it))*

**Table S1:** Karyotypic variability within HeLa cell lines.  
**Figure S1:** FISH analysis of HeLa lines.  
**Table S2:** Primer used for qRT-PCR to validate the microarray results.  
**Table S3:** Validation of genes mis-regulated by hypoxia by qRT-PCR in the HeLaSR and HeLaP.

**Table S1: Karyotypic variability within HeLa cell lines.**Adapted from: Rutledge<sup>1</sup>

| HeLa Cell Line                               | Modal Chr. Number    | Provenience                 | Reference |
|----------------------------------------------|----------------------|-----------------------------|-----------|
| HeLa-S3 (CRL-7924)                           | 68 (range: 54 - 79)  | ATCC                        | 2         |
| HeLa (ATCC <sup>®</sup> CCL-2 <sup>™</sup> ) | 82 (range: 70 - 164) | ATCC                        | 2         |
| HeLa <i>Kyoto</i>                            | 65 (range: 62 - 68)  | CLS Cell Lines Service GmbH | 3         |
| HeLa                                         | 67                   | Undefined                   | 4         |
| HeLa CCL2                                    | 78 (range: 76 - 80)  | ATCC                        | 5         |
| HeLa-S3                                      | 68                   | Provided by colleagues      | 6         |
| HeLa-20                                      | 112                  | Provided by colleagues      | 6         |
| HeLa-80                                      | 84                   | Provided by colleagues      | 6         |
| HeLa                                         | 74 (range: 69 - 77)  | Undefined                   | 7         |
| HeLa                                         | 65 (range: 62 - 67)  | Provided by colleagues      | 8         |
| HeLa D98/AH-2                                | 62 (range 58 - 65)   | Undefined                   | 9         |
| HeLa                                         | 84 (range: 58 - 179) | ATCC                        | 10        |
| HeLa-S3                                      | 68 (range: 51 - 74)  | ATCC                        | 10        |
| HeLa                                         | 84 (range: 58 - 179) | ATCC                        | 11        |
| HeLa                                         | 77                   | Provided by colleagues      | 12        |
| HeLa                                         | 75 (range: 73 - 76)  | Provided by colleagues      | 12        |
| HeLa D98/AG                                  | 63                   | Provided by colleagues      | 12        |
| HeLa                                         | 69 (range:60 - 80)   | Provided by colleagues      | 13        |
| HeLa                                         | 60                   | Provided by colleagues      | 14        |
| HeLa                                         | 69                   | Provided by colleagues      | 15        |
| HeLa                                         | 71                   | Provided by colleagues      | 16        |
| HeLa D98/AtH2                                | 60 (range 57 - 63)   | ATCC                        | 17        |
| HeLa D98/AH-2 cells                          | 62 (range 57 - 63)   | ATCC                        | 17        |
| HeLa                                         | 69                   | Provided by colleagues      | 18        |
| HeLa A-CCL 2                                 | 77 (range: 56 - >86) | ATCC                        | 19        |
| HeLa 229-CCL2.1                              | 78 (range: 56 - 86)  | ATCC                        | 19        |
| HeLa G                                       | 69 (range: 62 - 72)  | Company                     | 19        |
| HeLa S3G                                     | 76 (range: 65 - 79)  | Company                     | 19        |
| HeLa65                                       | 65 (range: 62 - 69)  | Provided by colleagues      | 19        |
| HeLa71                                       | 70 (range: 59 - 72)  | Provided by colleagues      | 19        |
| Hela75                                       | 74 (range: 61 - 77)  | Provided by colleagues      | 19        |
| HeLa                                         | 59 (range: 57 - 64)  | Provided by colleagues      | 20        |
| HeLa                                         | 51                   | Undefined                   | 21        |
| HeLa                                         | 69 (range: 67-70)    | Provided by colleagues      | 22        |
| HeLa                                         | 61 (range: 59-62)    | Provided by colleagues      | 22        |
| HeLa St1                                     | 77                   | Provided by colleagues      | 23        |
| HeLa F8                                      | 70                   | Provided by colleagues      | 23        |
| HeLa S1 and S3                               | 78 (range:75 - 82)   | Provided by colleagues      | 24        |

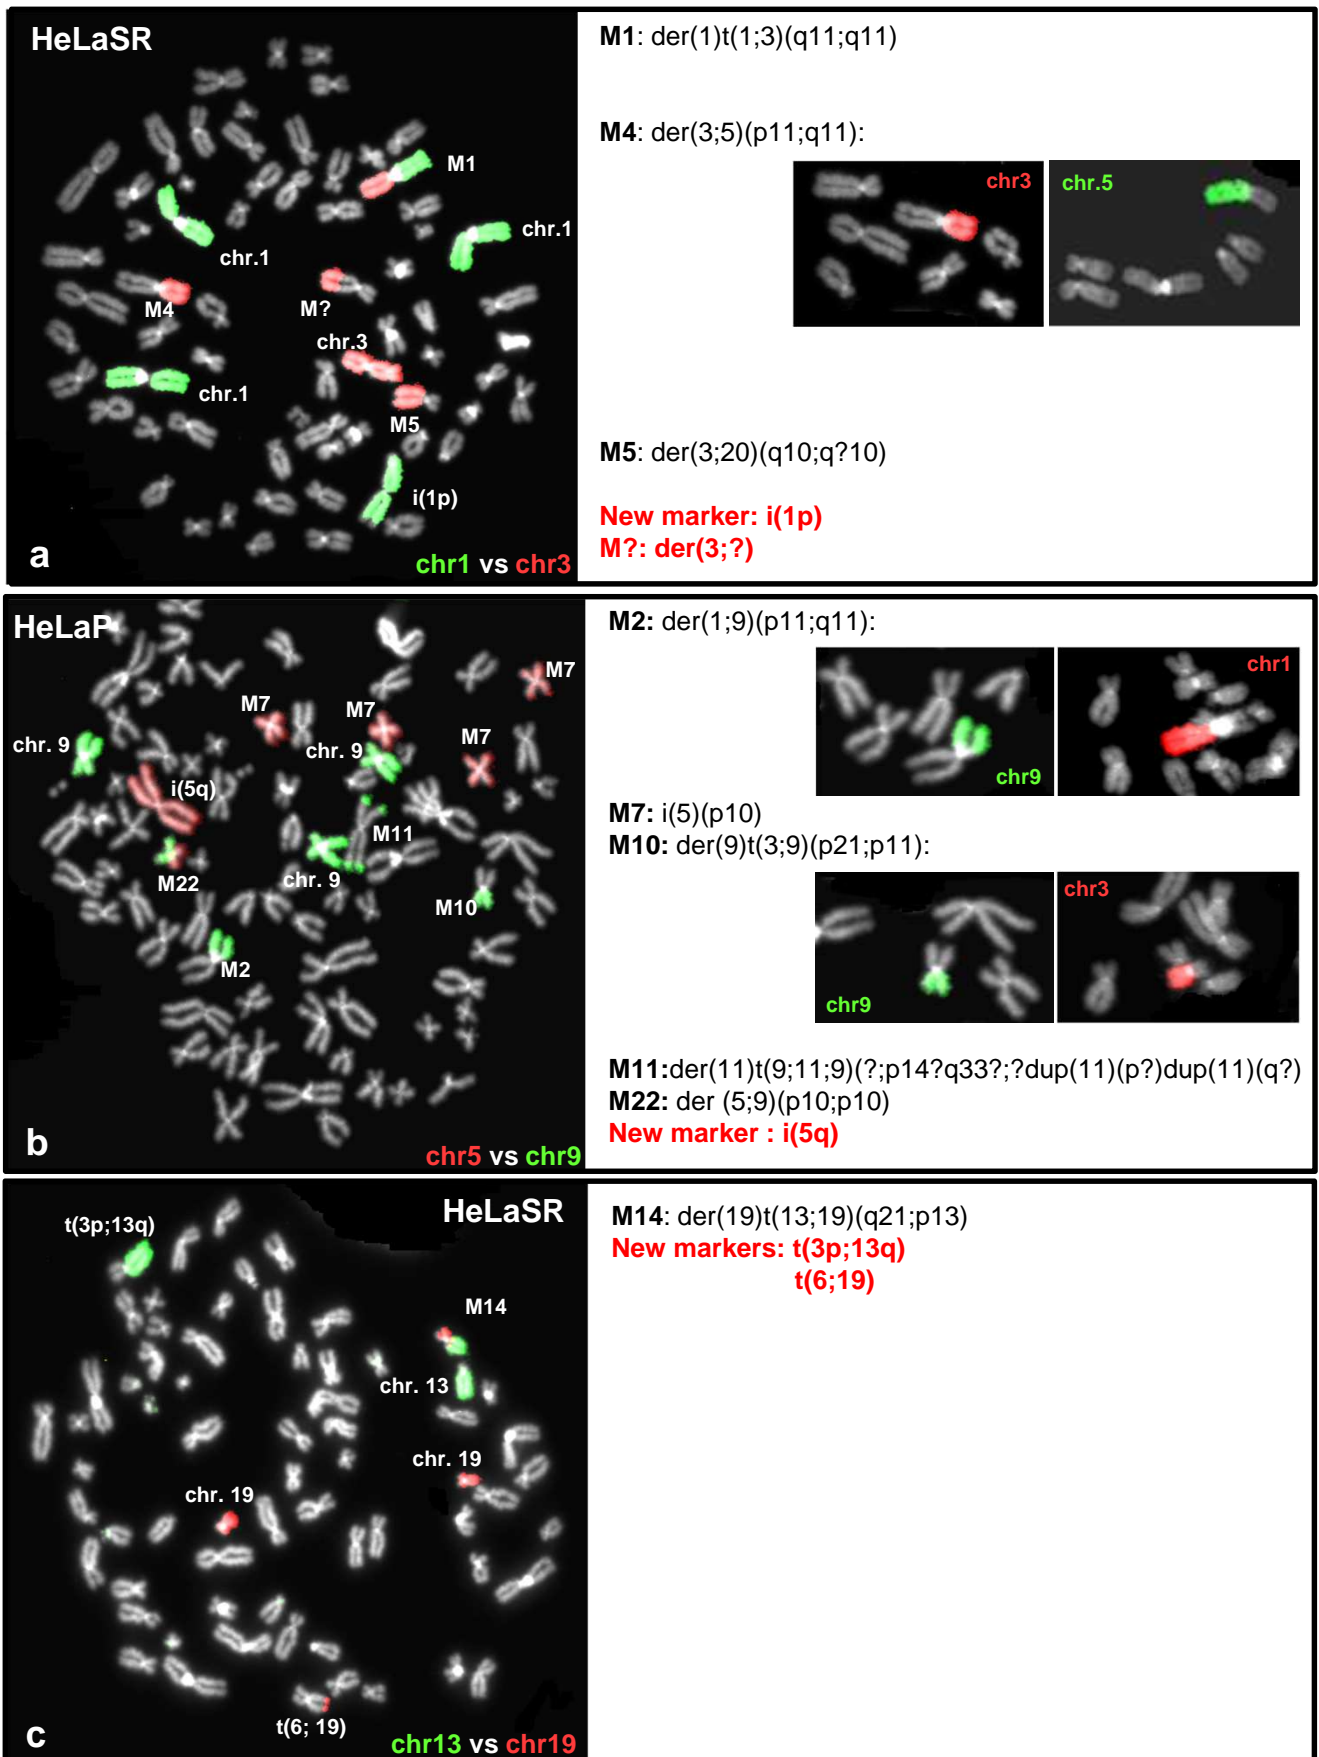

**Figure S1: FISH analysis of HeLa lines.** FISH analysis was performed using WCP (Whole Chromosome Painting) of chr.1 vs chr.3 (a); chr.5 vs chr.9 (b); chr.13 vs chr.19 (c). HeLa clones display almost all the HeLa-specific markers; in addition our FISH analysis highlights the appearance in each batch of new specific markers (see Table 1) (Leica D500B).

**Table S2: Primer used for qRT-PCR to validate the microarray results.**

| Gene name                                      | ac_number      | Primer forward (5'→3') | Primer reverse (5'→3') |
|------------------------------------------------|----------------|------------------------|------------------------|
| Adrenoceptor beta 2, surface                   | NM_000024.5    | CAGGAAAGGGACGAGGTGTG   | CAGCACATTGCCAAACACGA   |
| BCL2-associated X protein                      | NM_001291428.1 | AGCTGAGCGAGTGTCTCAAG   | GGAAAAAGACCTCTCGGGGG   |
| CCAAT/enhancer binding protein (C/EBP),beta    | NM_001285878.1 | GGCCGGTTTCGAAGTTGATG   | GCTGACAGTTACACGTGGGT   |
| Egl-9 family hypoxia-inducible factor 1        | NM_022051.2    | TTTTCTGGTCTGACCGTCGC   | AGCTCGTGCTCTCTCATCTG   |
| Egl-9 family hypoxia-inducible factor 3        | NM_022073.3    | AGCTTCCTCCTGTCCCTCAT   | ATAGCAAGCCACCATTGCCT   |
| Early growth response 1                        | NM_001964.2    | CACCTGACCGCAGAGTCTTT   | TTTGGCTGGGGTAACTGGTC   |
| Heat shock protein 90kDa                       | NM_007355      | TCTGGGTATCGGAAAGCAAGCC | GTGCACTTCCTCAGGCATCTTG |
| Hypoxia inducible lipid droplet-associated     | NM_001098786.1 | CGCTGGTGCTTAGTAACCGA   | TTCTGAAAGGCCTCTGGACC   |
| Immediate early response 3                     | NM_003897.3    | CCGCAGGGTTCTCTACCCTC   | AGAAGCCTTTTGGCTGGGTT   |
| Ribosomal protein S18                          | NM_022551.2    | TGTGGTGTTGAGGAAAGCA    | CTTCAGTCGCTCCAGGTCTT   |
| Ubiquitin C                                    | NM_021009.6    | GTGGCACAGCTAGTTCCGT    | GTCAAGTGACGATCACAGCG   |
| Tumour protein p53                             | NM_000546.5    | AGAAAACCTACCAGGGCAGC   | ACATCTTGTTGAGGGCAGGG   |
| Vascular endothelial growth factor A isoform a | NM_001025366.2 | TCACCAAGGCCAGCACATAG   | TTTCTCCGCTCTGAGCAAGG   |

**Table S3: Validation of genes regulated by hypoxia by qRT-PCR in the HeLaSR and HeLaP.**

| Detector                                       |             | FC HeLaSR |            | FC HeLaP |            |
|------------------------------------------------|-------------|-----------|------------|----------|------------|
| Gene name                                      | Gene symbol | qRT-PCR   | microarray | qRT-PCR  | microarray |
| Adrenoceptor beta 2, surface                   | ADBR2       | -3.2      | -1.8       | 0.8      | 0.2        |
| BCL2-associated X protein                      | BAX         | -0.3      | 0.2        | 0.2      | 0.1        |
| CCAAT/enhancer binding protein beta            | CEBPB       | 1.8       | 1.4        | 0.4      | 0.1        |
| Egl-9 family hypoxia-inducible factor 1        | EGLN1       | -1.6      | 1.5        | 4.8      | 1.4        |
| Egl-9 family hypoxia-inducible factor 3        | EGLN3       | 0.1       | 0.5        | 3.8      | 2.2        |
| Early growth response 1                        | EGR1        | -6.8      | -6.3       | 1.7      | 1.0        |
| Hypoxia inducible lipid droplet-associated     | HILPDA      | 4.1       | 3.8        | 3.1      | 2.4        |
| Immediate early response 3                     | IER3        | 6.4       | 2.8        | 2.2      | 1.1        |
| Tumor protein p53                              | TP53        | -0.4      | -1.2       | 1.3      | -0.3       |
| Vascular endothelial growth factor A isoform a | VEGFA       | 1.3       | 4.3        | 4.9      | 2.2        |

Fold change (FC) expresses the difference of the mean log control and mean log hypoxia stimulated data.

FC qRT-PCR: regulation measured by real-time PCR technology; FC array: regulation done with microarray technology.

## Supplementary references (related to Supplementary Table 1)

1. Rutledge S. What HeLa Cells Are You Using? (2014) Website <https://thewinnower.com/papers/what-hela-cells-are-you-using> Available at: insert website here. (Accessed: 19th May 2015).
2. ATCC Website <http://www.lgcstandards-atcc.org/>
3. Landry, J.J. *et al.* The genomic and transcriptomic landscape of a HeLa cell line. *G3* (Bethesda). **3**, 1213-1224 (2013).
4. Duesberg, P., Mandrioli, D., McCormack, A. & Nicholson, J.M. Is carcinogenesis a form of speciation. *Cell Cycle* **10**, 2100-2114 (2011).
5. Macville, M. *et al.* Comprehensive and definitive molecular cytogenetic characterization of HeLa cells by spectral karyotyping. *Cancer Res* **59**, 141-150 (1999).
6. Gille, J.J.P. & Joenje, H. Chromosomal instability and progressive loss of chromosomes in HeLa cells during adaptation to hyperoxic growth conditions. *Mutation Research/DNAging* **219**, 225-230 (1989).
7. Mincheva, A., Gissmann, L. & Zur Hausen, H. Chromosomal integration sites of human papillomavirus DNA in three cervical cancer cell lines mapped by in situ hybridization. *Medical Microbiology and Immunology* **176**, 245-256 (1987).
8. Ash, J.F., Fineman, R.M., Kalka, T., Morgan, M. & Wire, B. Amplification of sodium-and potassium-activated adenosinetriphosphatase in HeLa cells by ouabain step selection. *The Journal of Cell Biology* **99**, 971-983 (1984).
9. Stanbridge, E.J., Flandermeyer, R.R., Daniels, D.W & Nelson-Rees, W.A. Specific chromosome loss associated with the expression of tumorigenicity in human cell hybrids. *Somatic cell genetics* **7**, 699-712 (1981).
10. Lavappa, K. S. Survey of ATCC stocks of human cell lines for HeLa contamination. *In Vitro* **14**, 469–475 (1978).
11. Lavappa, K.S., Macy, M.L. & Shannon, J.E. Examination of ATCC stocks for HeLa marker chromosomes in human cell lines. *Nature* **259**, 211–213 (1976).
12. Heneen, W.K. HeLa cells and their possible contamination of other cell lines: karyotype studies. *Hereditas* **82**, 217-247 (1976).
13. Ghosh, S. & Ghosh, I. Variation of stemline karyotype in a HeLa cell line. *Zeitschrift für Krebsforschung und Klinische Onkologie* **84**, 129-133 (1975).
14. Obara, Y., Chai, L.S., Weinfeld, H. & Sandberg, A.A. Prophasing of interphase nuclei and induction of nuclear envelopes around metaphase chromosomes in HeLa and Chinese hamster homo-and heterokaryons. *The Journal of Cell Biology* **62**, 104-113 (1974).
15. Singer, R.M. & Fishman, W.H. Characterization of two HeLa sublines: TCRC-1 produces Regan isoenzyme and TCRC-2, non-Regan isoenzyme. *J Cell Biol* **60**, 777-780 (1974).

16. Czaker, R. Banding patterns and late replication in HeLa cells. *Humangenetik* **19**, 135-144 (1973).
17. Francke, U., Hammond, D.S. & Schneider, J.A. The band patterns of twelve D 98/AH-2 marker chromosomes and their use for identification of intraspecific cell hybrids. *Chromosoma* **41**, 111-121 (1973).
18. Ghosh, I. & Ghosh, S. Karyological studies on two HeLa lines. *Z Krebsforsch.* **74**, 103-9 (1970).
19. Bottomley, RH, Trainer, A.L. & Griffin, M.J. Enzymatic and chromosomal characterization of HeLa variants. *The Journal of Cell Biology* **41**, 806-815 (1969).
20. Dziekanowska, D. & Szurma, J. A hela subline with an established chromosome pattern and with a stemline chromosome number of 59. *Genetica* **39**, 237-244 (1968).
21. Hughes, D.T. The role of chromosomes in the characterisation of human neoplasms. *European Journal of Cancer* **1**, 233-243. (1965).
22. Cireli, E., Frimmel, J. & Schwarzacher, H.G. Cytogenetic studies on the HeLa cells. I. Chromosomes, DNA content and structure of the interphase nucleus. *Acta Anat* (Basel) **65**, 170-81 (1966).
23. Vogt, M. A. Study of the relationship between karyotype and phenotype in cloned lines of strain Hela. *Genetics* **44**, 1257 (1959).
24. Tjio, J.H. & Puck T.T. Genetics of somatic mammalian cells. II. Chromosomal constitution of cells in tissue culture. *J Exp Med.* **108**, 259-268 (1958).
